# Supplementary material for: NLLSS: Predicting Synergistic Drug Combinations Based on Semi-supervised Learning
Source: PLoS Comput Biol. 2016 Jul 14;12(7):e1004975. doi: 10.1371/journal.pcbi.1004975 (PMC4945015; doi:10.1371/journal.pcbi.1004975)
Supplement: S4 Table — (XLS) [file pcbi.1004975.s009.xls]

## Sheet: synergy
Drug A	Drug B	Evidence	PMID
Allicin	Fluconazole	Guo et al., 2010	19878317
Amiodarone	Micafungin	Nishi et al., 2009	19280292
Amphotericin B	Caspofungin	Franzot et al., 1997	9021188
Amphotericin B	Disulfiram	Borisy et al., 2003	12799470
Amphotericin B	Flucytosine	Chen et al., 1982	7047097
Amphotericin B	Micafungin	Serena et al., 2005	15980382
Amphotericin B	Terbinafine	Barchiesi et al. , 1998	9511038
Amphotericin B	Tetracycline	Oliver et al ., 2008	18310042
Calyculin A	Cantharidin	Hoon et al. , 2008	18622389
Cyclosporine A	Fenpropimorph	Jansen et al., 2009	20029371
Cyclosporine A	Fluconazole	Jansen et al., 2009	20029371
Cyclosporine A	Itraconazole	Li et al., 2008	18194958
Cyclosporine A	Tunicamycin	Jansen et al., 2009	20029371
Cyclosporine A	Voriconazole	Li et al., 2008	18194958
Dacarbazine	Estradiol	Borisy et al., 2003	12799470
Dacarbazine	Phenazopyridine	Borisy et al., 2003	12799470
Dacarbazine	Tamoxifen	Borisy et al., 2003	12799470
Disulfiram	Pentamidine	Borisy et al., 2003	12799470
Fk506	Fenpropimorph	Onyewu et al., 2003	12604527
Fk506	Fluconazole	Jansen et al., 2009	20029371
Fk506	Terbinafine	Onyewu et al., 2003	12604527
Fk506	Tunicamycin	Jansen et al., 2009	20029371
Fluconazole	Alverine Citrate	Jansen et al., 2009	20029371
Fluconazole	Amitriptyline	Marchetti et al., 2000	10952582
Fluconazole	Berberine	Quan et al., 2006	16495278
Fluconazole	Caspofungin	Jansen et al., 2009	20029371
Fluconazole	Chlorpromazine	Jansen et al., 2009	20029371
Fluconazole	Clomipramine	Marchetti et al.,2000	10952582
Fluconazole	Fenpropimorph	Jansen et al., 2009	20029371
Fluconazole	Flucytosine	Nguyen et al., 1997	9145879
Fluconazole	Latrunculin A	Jansen et al., 2009	20029371
Fluconazole	Ofloxacin	Sasaki et al., 2000	11810556
Fluconazole	Phenazopyridine	Jansen et al., 2009	20029371
Fluconazole	Retigeric Acid B	Sun et al., 2009	19171796
Fluconazole	Terbinafine	Lehár et al., 2007	17332758
Fluconazole	Wortmannin	Jansen et al., 2009	20029371
Haloprogin	Pentolinium	Borisy et al., 2003	12799470
Itraconazole	Amphotericin	Denning et al., 1992	1309690
Itraconazole	FK506	Sun et al., 2008	18056277
Itraconazole	Flucytosine	Barchiesi et al., 1999	9511038
Itraconazole	Retigeric acid B	Sun et al., 2009	19171796
Itraconazole	Terbinafine	Barchiesi et al. ,1998	9511038
Ketoconazole	Amphotericin	Odds FC 1982	6295266
Ketoconazole	Beauvericin	Zhang et al., 2007	17360571
Ketoconazole	Berberine	Zhang et al., 2007	17360571
Ketoconazole	Cyclosporine A	Zhang et al., 2007	17360571
Ketoconazole	Disulfiram	Borisy et al., 2003	12799470
Ketoconazole	Geldanamycin	Zhang et al., 2007	17360571
Ketoconazole	Lovastatin	Zhang et al., 2007	17360571
Ketoconazole	Pentamidine	Borisy et al., 2003	12799470
Ketoconazole	Radicicol	Zhang et al., 2007	17360571
Ketoconazole	Retigeric Acid B	Sun et al., 2009	19171796
Ketoconazole	Ribavirin	Borisy et al., 2003	12799470
Lovastatin	Fluconazole	Song et al., 2003	14653518
Methoxsalen	Tamoxifen	Borisy et al., 2003	12799470
Micafungin	Fluconazole	Nishi et al., 2009	19280292
Micafungin	Flucytosine	Nishi et al., 2009	19280292
Miconazole	Terbinafine	Lehár et al., 2007	17332758
Pentamidine	Pentolinium	Borisy et al., 2003	12799470
Pentamidine	Phenazopyridine	Borisy et al., 2003	12799470
Pentamidine	Ribavirin	Borisy et al., 2003	12799470
Pentamidine	Tamoxifen	Borisy et al., 2003	12799470
Perphenazine	Phenazopyridine	Borisy et al., 2003	12799470
Perphenazine	Tamoxifen	Borisy et al., 2003	12799470
Phenazopyridine	Phenelzine	Borisy et al., 2003	12799470
Phenelzine	Tamoxifen	Borisy et al., 2003	12799470
Posaconazole	Caspofungin	Oliveira et al., 2005	16048980
Sulconazole	Pentolinium	Borisy et al., 2003	12799470
Voriconazole	FK506	Sun et al., 2008	18056277
Voriconazole	Micafungin	Nishi et al., 2009	19280292
Voriconazole	Terbinafine	Weig et al., 2001	11181393
