# Supplementary material for: NLLSS: Predicting Synergistic Drug Combinations Based on Semi-supervised Learning
Source: PLoS Comput Biol. 2016 Jul 14;12(7):e1004975. doi: 10.1371/journal.pcbi.1004975 (PMC4945015; doi:10.1371/journal.pcbi.1004975)
Supplement: S12 Table — (XLS) [file pcbi.1004975.s017.xls]

## Sheet: Sheet1
Principal drug ID	Adjuvant drug ID	Rank
18	4	1
17	27	2
4	20	3
24	19	4
24	8	5
29	27	6
8	27	7
24	32	8
8	50	9
38	46	10
44	41	11
24	21	12
19	27	13
48	8	14
26	25	15
23	29	16
18	5	17
18	22	18
40	50	19
38	32	20
6	25	21
23	6	22
23	11	23
18	14	24
38	12	25
29	41	26
24	3	27
10	41	28
39	20	29
24	2	30
18	36	31
13	20	32
10	33	33
5	20	34
44	32	35
20	20	36
28	39	37
4	4	38
29	46	39
24	9	40
24	39	41
19	50	42
36	31	43
2	27	44
23	25	45
18	25	46
30	12	47
4	50	48
38	19	49
2	25	50
23	20	51
18	43	52
24	28	53
24	51	54
17	41	55
33	20	56
36	27	57
44	12	58
18	45	59
44	16	60
25	27	61
23	2	62
10	46	63
44	46	64
25	25	65
49	27	66
24	35	67
49	25	68
41	20	69
1	25	70
24	1	71
18	20	72
29	33	73
4	12	74
13	25	75
16	25	76
32	25	77
23	28	78
23	14	79
10	4	80
24	18	81
43	20	82
9	27	83
32	27	84
23	51	85
23	18	86
9	25	87
14	46	88
30	32	89
23	1	90
4	19	91
38	42	92
17	33	93
26	50	94
30	8	95
23	3	96
23	35	97
18	27	98
40	41	99
1	27	100
8	33	101
6	50	102
48	42	103
17	4	104
16	27	105
24	20	106
23	9	107
24	27	108
33	36	109
19	46	110
48	21	111
8	21	112
48	4	113
30	42	114
38	4	115
4	41	116
30	19	117
23	36	118
36	25	119
19	8	120
44	21	121
24	25	122
38	21	123
40	33	124
23	22	125
19	41	126
23	39	127
10	16	128
33	25	129
23	27	130
20	25	131
18	7	132
18	38	133
23	5	134
46	46	135
16	46	136
5	25	137
24	45	138
18	47	139
30	4	140
39	25	141
48	20	142
4	33	143
15	40	144
18	50	145
8	32	146
40	4	147
16	4	148
43	27	149
37	17	150
29	32	151
7	20	152
46	32	153
4	18	154
4	42	155
41	25	156
15	36	157
23	43	158
15	38	159
44	18	160
44	49	161
29	8	162
35	17	163
33	17	164
30	21	165
14	12	166
18	17	167
40	46	168
19	19	169
19	33	170
1	50	171
25	50	172
49	50	173
44	42	174
16	50	175
16	32	176
2	50	177
9	50	178
17	32	179
32	50	180
17	16	181
36	50	182
17	21	183
15	20	184
8	19	185
29	19	186
3	8	187
44	36	188
29	49	189
8	12	190
14	8	191
48	29	192
33	46	193
28	27	194
3	46	195
48	25	196
19	12	197
8	8	198
19	21	199
18	33	200
24	37	201
48	11	202
48	6	203
24	31	204
46	20	205
23	50	206
18	24	207
8	16	208
17	8	209
30	11	210
35	20	211
34	27	212
4	15	213
10	8	214
8	49	215
46	8	216
4	11	217
18	49	218
30	6	219
10	21	220
29	16	221
8	18	222
6	4	223
17	19	224
16	8	225
29	18	226
30	29	227
6	33	228
4	6	229
3	20	230
30	20	231
29	12	232
22	20	233
36	4	234
26	33	235
10	32	236
17	12	237
4	39	238
38	29	239
26	4	240
13	50	241
26	41	242
40	8	243
38	11	244
38	6	245
40	32	246
8	42	247
14	42	248
30	39	249
29	42	250
4	29	251
10	19	252
6	41	253
23	47	254
4	49	255
46	4	256
9	4	257
28	17	258
32	4	259
15	31	260
48	39	261
36	33	262
48	18	263
18	41	264
14	19	265
48	3	266
18	44	267
35	46	268
48	28	269
40	21	270
48	1	271
4	36	272
18	48	273
33	4	274
40	16	275
43	46	276
2	4	277
14	32	278
48	51	279
4	9	280
44	45	281
24	10	282
48	2	283
4	3	284
44	38	285
19	42	286
3	12	287
40	49	288
41	4	289
4	35	290
48	9	291
3	19	292
4	43	293
46	42	294
24	38	295
10	36	296
42	46	297
48	35	298
33	12	299
12	20	300
18	31	301
5	36	302
38	20	303
18	40	304
4	2	305
33	5	306
4	51	307
47	20	308
36	46	309
49	4	310
44	44	311
3	4	312
36	45	313
14	4	314
33	11	315
4	45	316
44	39	317
18	16	318
25	4	319
43	39	320
43	45	321
4	16	322
8	36	323
33	8	324
43	4	325
24	47	326
30	14	327
43	10	328
45	20	329
1	4	330
41	45	331
40	18	332
33	32	333
13	33	334
24	40	335
43	43	336
16	21	337
16	42	338
19	18	339
6	36	340
4	28	341
19	49	342
5	50	343
42	45	344
35	27	345
46	21	346
20	50	347
42	39	348
36	39	349
42	20	350
39	36	351
44	11	352
43	44	353
36	44	354
33	50	355
28	20	356
33	6	357
35	32	358
20	36	359
35	37	360
9	46	361
13	46	362
34	38	363
33	22	364
18	37	365
44	14	366
48	27	367
37	27	368
30	18	369
28	37	370
24	50	371
39	50	372
24	41	373
48	14	374
38	39	375
24	13	376
6	46	377
37	37	378
16	33	379
30	36	380
40	14	381
34	40	382
38	14	383
35	12	384
34	31	385
4	1	386
13	42	387
24	44	388
37	20	389
30	25	390
36	41	391
13	41	392
29	36	393
14	20	394
26	36	395
38	27	396
10	38	397
11	27	398
44	6	399
10	12	400
41	50	401
23	33	402
19	36	403
33	33	404
3	25	405
40	47	406
4	5	407
3	27	408
40	36	409
33	29	410
44	9	411
3	39	412
32	46	413
33	21	414
33	42	415
11	37	416
44	47	417
6	45	418
34	20	419
5	4	420
3	21	421
2	19	422
34	13	423
42	27	424
41	14	425
46	25	426
42	43	427
43	6	428
13	43	429
41	44	430
13	8	431
8	14	432
42	14	433
4	30	434
14	6	435
14	11	436
14	29	437
43	25	438
23	45	439
14	21	440
41	43	441
13	44	442
23	49	443
42	12	444
28	14	445
26	46	446
38	36	447
13	32	448
9	19	449
44	35	450
16	18	451
14	39	452
17	2	453
13	31	454
39	4	455
28	43	456
17	11	457
19	16	458
6	16	459
26	16	460
44	29	461
27	20	462
33	41	463
41	38	464
35	43	465
2	46	466
18	15	467
38	25	468
10	44	469
46	27	470
35	14	471
4	22	472
41	31	473
23	41	474
3	45	475
13	14	476
13	38	477
43	32	478
18	30	479
36	16	480
29	14	481
6	19	482
43	11	483
24	33	484
17	9	485
9	45	486
38	18	487
42	19	488
18	13	489
44	3	490
24	49	491
48	45	492
30	43	493
16	41	494
8	11	495
36	32	496
26	49	497
30	3	498
34	4	499
41	46	500
44	2	501
6	39	502
4	37	503
33	19	504
9	39	505
44	43	506
43	12	507
17	36	508
17	47	509
36	6	510
43	50	511
30	5	512
18	10	513
41	40	514
17	6	515
32	19	516
46	29	517
41	33	518
25	41	519
20	4	520
30	9	521
49	46	522
40	19	523
37	43	524
9	33	525
14	36	526
30	27	527
17	44	528
6	32	529
38	28	530
1	41	531
2	41	532
43	9	533
49	41	534
43	8	535
38	2	536
10	45	537
35	36	538
37	14	539
13	40	540
32	41	541
41	39	542
38	1	543
38	51	544
30	2	545
33	47	546
38	35	547
6	8	548
6	14	549
5	33	550
33	38	551
17	42	552
2	33	553
25	46	554
8	45	555
36	43	556
36	9	557
38	3	558
9	41	559
26	18	560
17	3	561
8	6	562
30	22	563
13	6	564
38	9	565
48	22	566
48	5	567
36	11	568
47	27	569
48	36	570
42	32	571
39	33	572
37	12	573
28	36	574
10	40	575
30	1	576
30	45	577
30	35	578
29	47	579
33	16	580
16	29	581
30	51	582
41	13	583
17	35	584
2	12	585
36	19	586
1	33	587
9	32	588
20	33	589
11	43	590
32	33	591
49	33	592
13	19	593
6	49	594
35	19	595
8	5	596
44	51	597
17	14	598
30	28	599
33	31	600
6	18	601
5	8	602
26	19	603
46	6	604
37	46	605
44	40	606
43	33	607
25	33	608
12	45	609
15	27	610
44	28	611
16	11	612
9	12	613
11	20	614
16	6	615
8	47	616
29	11	617
17	38	618
47	32	619
36	12	620
46	11	621
4	44	622
13	21	623
29	45	624
17	39	625
29	39	626
3	42	627
10	47	628
17	29	629
24	17	630
38	43	631
43	21	632
12	32	633
19	14	634
37	36	635
19	45	636
10	2	637
35	8	638
11	14	639
43	19	640
33	40	641
11	36	642
13	13	643
42	4	644
33	13	645
23	38	646
8	38	647
47	46	648
35	25	649
24	7	650
7	27	651
26	8	652
10	39	653
32	12	654
41	41	655
36	18	656
29	6	657
16	39	658
8	29	659
44	13	660
13	5	661
44	5	662
9	36	663
27	27	664
11	46	665
39	8	666
5	46	667
17	45	668
25	49	669
15	46	670
48	47	671
43	3	672
47	45	673
49	19	674
43	42	675
5	14	676
32	32	677
48	43	678
29	38	679
12	39	680
10	9	681
6	37	682
6	43	683
42	8	684
36	10	685
11	32	686
2	36	687
23	13	688
1	49	689
33	10	690
41	6	691
12	27	692
1	46	693
39	46	694
34	6	695
13	22	696
11	25	697
40	45	698
41	8	699
28	12	700
33	9	701
35	11	702
14	14	703
8	43	704
8	44	705
49	49	706
36	8	707
19	47	708
25	18	709
11	12	710
10	13	711
16	36	712
44	17	713
26	32	714
20	14	715
10	35	716
33	2	717
8	22	718
46	28	719
42	36	720
36	3	721
43	18	722
16	45	723
2	32	724
10	31	725
39	14	726
6	21	727
25	19	728
8	39	729
19	11	730
49	18	731
17	51	732
1	18	733
13	12	734
33	3	735
33	18	736
4	38	737
48	50	738
46	1	739
28	46	740
20	8	741
33	44	742
10	14	743
38	5	744
16	49	745
22	19	746
10	11	747
32	18	748
37	32	749
19	6	750
14	43	751
29	44	752
45	45	753
13	16	754
9	18	755
24	16	756
35	21	757
44	1	758
19	38	759
21	27	760
29	29	761
46	18	762
1	19	763
2	18	764
46	51	765
23	40	766
41	37	767
38	22	768
9	13	769
32	49	770
26	21	771
41	32	772
16	28	773
35	4	774
22	46	775
22	12	776
36	21	777
37	25	778
34	43	779
37	19	780
5	41	781
29	13	782
43	5	783
43	48	784
24	24	785
42	42	786
5	45	787
47	39	788
40	12	789
19	39	790
47	19	791
44	31	792
17	28	793
10	42	794
9	8	795
2	49	796
17	40	797
17	24	798
19	29	799
24	15	800
16	51	801
14	37	802
35	42	803
16	1	804
3	36	805
20	41	806
39	41	807
16	35	808
35	6	809
11	11	810
6	38	811
16	9	812
37	40	813
41	16	814
13	11	815
6	12	816
16	2	817
39	45	818
40	44	819
12	46	820
44	24	821
11	9	822
46	35	823
44	22	824
10	24	825
40	38	826
14	27	827
22	27	828
29	9	829
39	32	830
11	3	831
29	43	832
17	1	833
9	49	834
16	3	835
3	14	836
46	2	837
2	13	838
47	12	839
34	16	840
46	3	841
10	3	842
21	20	843
20	46	844
43	37	845
28	25	846
9	38	847
34	45	848
44	37	849
34	46	850
5	32	851
4	17	852
8	9	853
23	31	854
14	45	855
2	38	856
29	35	857
7	46	858
10	6	859
47	4	860
41	12	861
4	7	862
5	19	863
32	36	864
7	32	865
24	30	866
4	23	867
43	14	868
11	2	869
46	9	870
41	19	871
13	45	872
17	5	873
36	5	874
9	40	875
35	9	876
36	49	877
35	2	878
5	39	879
46	39	880
4	26	881
35	3	882
24	48	883
32	8	884
10	43	885
2	40	886
15	12	887
45	27	888
12	4	889
43	16	890
15	25	891
33	35	892
37	11	893
9	21	894
49	32	895
44	7	896
39	19	897
37	13	898
29	40	899
17	43	900
11	40	901
7	45	902
8	40	903
37	8	904
13	10	905
29	5	906
45	39	907
28	32	908
6	13	909
37	9	910
8	3	911
37	2	912
26	14	913
2	8	914
32	21	915
13	29	916
43	7	917
37	3	918
35	40	919
37	38	920
12	19	921
22	45	922
24	26	923
8	35	924
11	6	925
23	17	926
7	4	927
36	48	928
10	17	929
21	12	930
29	2	931
49	12	932
43	24	933
12	36	934
30	50	935
29	3	936
35	29	937
14	18	938
15	19	939
4	48	940
11	19	941
26	38	942
39	39	943
2	21	944
48	33	945
45	36	946
46	50	947
17	13	948
19	9	949
16	13	950
15	39	951
34	11	952
8	2	953
34	10	954
7	19	955
45	32	956
19	5	957
18	23	958
19	40	959
12	12	960
8	13	961
19	13	962
35	13	963
22	39	964
14	5	965
14	22	966
24	23	967
38	50	968
34	5	969
11	38	970
21	19	971
36	17	972
47	36	973
5	37	974
48	41	975
41	10	976
48	49	977
11	8	978
46	22	979
4	24	980
20	49	981
11	18	982
16	16	983
37	21	984
5	21	985
19	35	986
33	48	987
32	13	988
36	24	989
6	40	990
46	14	991
41	11	992
11	21	993
25	12	994
4	31	995
41	18	996
20	18	997
13	49	998
7	12	999
23	37	1000
30	37	1001
17	17	1002
37	6	1003
16	22	1004
15	4	1005
34	25	1006
10	51	1007
36	37	1008
28	19	1009
46	36	1010
34	39	1011
16	43	1012
17	7	1013
49	36	1014
19	2	1015
42	11	1016
45	13	1017
41	21	1018
49	13	1019
11	35	1020
26	12	1021
5	16	1022
20	16	1023
39	16	1024
19	43	1025
45	19	1026
7	39	1027
34	33	1028
29	22	1029
14	1	1030
14	2	1031
14	3	1032
14	9	1033
14	28	1034
14	35	1035
14	51	1036
25	32	1037
29	51	1038
40	13	1039
16	38	1040
15	32	1041
47	8	1042
45	46	1043
11	42	1044
33	49	1045
38	45	1046
39	21	1047
49	21	1048
15	45	1049
16	14	1050
22	4	1051
25	36	1052
3	6	1053
36	7	1054
13	18	1055
44	10	1056
45	4	1057
2	45	1058
10	7	1059
2	39	1060
20	32	1061
27	46	1062
35	18	1063
42	21	1064
10	28	1065
3	29	1066
39	18	1067
5	18	1068
4	13	1069
33	51	1070
11	48	1071
28	4	1072
47	25	1073
16	5	1074
3	11	1075
11	51	1076
19	22	1077
41	5	1078
43	41	1079
10	29	1080
35	38	1081
43	29	1082
17	31	1083
25	21	1084
19	3	1085
5	43	1086
43	17	1087
1	16	1088
2	16	1089
9	16	1090
25	16	1091
32	16	1092
49	16	1093
43	2	1094
36	42	1095
43	22	1096
36	2	1097
32	38	1098
26	45	1099
42	6	1100
36	14	1101
42	29	1102
19	44	1103
10	10	1104
33	28	1105
20	45	1106
39	37	1107
25	13	1108
17	48	1109
22	32	1110
4	40	1111
38	47	1112
22	25	1113
46	5	1114
5	49	1115
13	39	1116
20	21	1117
44	48	1118
4	10	1119
20	47	1120
3	47	1121
40	39	1122
35	35	1123
49	8	1124
12	8	1125
29	28	1126
6	44	1127
7	36	1128
26	44	1129
49	38	1130
39	49	1131
43	49	1132
26	13	1133
46	45	1134
19	51	1135
11	28	1136
34	14	1137
32	40	1138
23	24	1139
13	37	1140
11	29	1141
1	32	1142
16	40	1143
10	23	1144
12	13	1145
1	12	1146
33	7	1147
35	51	1148
45	12	1149
18	26	1150
19	28	1151
39	43	1152
21	25	1153
8	51	1154
17	10	1155
1	38	1156
42	25	1157
7	8	1158
41	49	1159
22	8	1160
37	42	1161
40	40	1162
37	35	1163
37	18	1164
49	40	1165
28	8	1166
20	19	1167
36	29	1168
42	13	1169
26	47	1170
17	22	1171
12	25	1172
25	8	1173
46	43	1174
17	23	1175
41	47	1176
25	38	1177
37	4	1178
10	26	1179
15	8	1180
21	46	1181
28	13	1182
26	39	1183
27	25	1184
35	1	1185
7	25	1186
30	47	1187
23	44	1188
15	21	1189
34	22	1190
8	24	1191
11	44	1192
30	41	1193
8	7	1194
26	40	1195
29	31	1196
20	37	1197
5	47	1198
35	28	1199
27	19	1200
38	33	1201
1	36	1202
32	45	1203
37	29	1204
37	51	1205
8	31	1206
39	47	1207
14	25	1208
10	1	1209
36	22	1210
1	21	1211
3	18	1212
17	26	1213
10	48	1214
1	40	1215
30	49	1216
19	17	1217
46	33	1218
27	12	1219
29	1	1220
28	40	1221
3	2	1222
13	47	1223
41	42	1224
42	38	1225
3	35	1226
8	28	1227
3	9	1228
11	13	1229
11	31	1230
3	28	1231
43	35	1232
20	39	1233
41	22	1234
3	51	1235
1	13	1236
8	17	1237
48	37	1238
23	7	1239
25	40	1240
3	3	1241
40	43	1242
45	38	1243
45	40	1244
35	44	1245
44	30	1246
29	17	1247
3	1	1248
11	4	1249
37	31	1250
33	1	1251
20	43	1252
14	13	1253
7	13	1254
37	1	1255
23	15	1256
23	16	1257
48	38	1258
35	5	1259
27	32	1260
11	1	1261
45	25	1262
34	50	1263
29	7	1264
47	13	1265
37	28	1266
35	48	1267
37	48	1268
27	45	1269
35	50	1270
48	13	1271
30	13	1272
11	7	1273
5	38	1274
41	29	1275
44	15	1276
27	4	1277
28	38	1278
19	1	1279
11	16	1280
29	10	1281
32	39	1282
26	43	1283
5	12	1284
23	48	1285
11	33	1286
6	47	1287
36	35	1288
35	31	1289
3	13	1290
11	50	1291
27	39	1292
47	37	1293
23	30	1294
29	24	1295
10	5	1296
23	23	1297
39	12	1298
34	29	1299
26	37	1300
17	15	1301
29	48	1302
22	36	1303
34	12	1304
1	8	1305
34	42	1306
23	10	1307
42	40	1308
10	37	1309
22	13	1310
40	37	1311
44	23	1312
30	40	1313
33	24	1314
38	37	1315
45	8	1316
37	44	1317
17	30	1318
3	38	1319
11	24	1320
12	37	1321
34	41	1322
30	38	1323
8	1	1324
37	33	1325
10	30	1326
48	40	1327
27	36	1328
6	11	1329
15	43	1330
28	11	1331
41	17	1332
35	33	1333
38	13	1334
47	14	1335
47	21	1336
37	50	1337
23	26	1338
8	48	1339
47	42	1340
10	15	1341
12	14	1342
43	47	1343
40	11	1344
3	50	1345
9	42	1346
11	41	1347
47	50	1348
43	30	1349
11	5	1350
5	13	1351
36	47	1352
3	37	1353
34	32	1354
15	50	1355
15	42	1356
12	38	1357
12	40	1358
3	43	1359
9	37	1360
43	15	1361
44	26	1362
48	17	1363
12	42	1364
3	40	1365
8	10	1366
22	37	1367
47	43	1368
12	43	1369
34	24	1370
36	30	1371
28	42	1372
40	9	1373
22	21	1374
32	42	1375
6	6	1376
27	8	1377
40	17	1378
34	9	1379
36	15	1380
14	38	1381
14	40	1382
27	13	1383
6	42	1384
28	6	1385
9	11	1386
7	21	1387
9	43	1388
28	21	1389
19	24	1390
9	14	1391
37	5	1392
7	38	1393
7	40	1394
40	31	1395
33	30	1396
33	15	1397
47	38	1398
47	40	1399
6	31	1400
5	40	1401
7	42	1402
40	6	1403
12	21	1404
35	16	1405
37	16	1406
40	35	1407
38	38	1408
35	7	1409
37	7	1410
19	7	1411
16	37	1412
19	31	1413
41	9	1414
22	42	1415
28	50	1416
46	49	1417
34	18	1418
35	41	1419
15	11	1420
13	9	1421
40	7	1422
9	6	1423
22	14	1424
40	24	1425
48	31	1426
12	50	1427
38	40	1428
39	38	1429
42	5	1430
42	22	1431
49	45	1432
43	51	1433
11	47	1434
13	24	1435
37	41	1436
22	50	1437
32	11	1438
8	15	1439
6	9	1440
11	15	1441
5	44	1442
29	30	1443
39	44	1444
20	44	1445
42	50	1446
42	2	1447
29	37	1448
8	30	1449
42	18	1450
21	8	1451
48	24	1452
2	44	1453
14	50	1454
2	31	1455
42	3	1456
28	2	1457
42	9	1458
2	14	1459
21	21	1460
48	44	1461
7	50	1462
39	13	1463
16	44	1464
41	3	1465
27	21	1466
11	30	1467
15	6	1468
42	28	1469
28	5	1470
9	44	1471
42	35	1472
9	31	1473
22	38	1474
22	40	1475
15	14	1476
28	3	1477
28	9	1478
13	3	1479
32	6	1480
25	44	1481
32	44	1482
28	29	1483
5	31	1484
35	24	1485
37	24	1486
48	7	1487
2	43	1488
13	2	1489
48	16	1490
6	17	1491
7	37	1492
26	11	1493
34	3	1494
19	10	1495
29	15	1496
21	32	1497
34	8	1498
13	17	1499
8	37	1500
36	51	1501
34	7	1502
2	37	1503
9	29	1504
6	35	1505
28	33	1506
49	39	1507
41	2	1508
7	14	1509
30	31	1510
26	31	1511
2	42	1512
42	51	1513
40	10	1514
47	6	1515
47	11	1516
47	29	1517
22	43	1518
15	29	1519
32	14	1520
34	2	1521
35	22	1522
2	11	1523
40	3	1524
3	31	1525
49	44	1526
13	7	1527
27	50	1528
15	18	1529
5	42	1530
28	31	1531
48	15	1532
32	43	1533
41	24	1534
45	42	1535
39	11	1536
5	11	1537
40	5	1538
46	47	1539
45	50	1540
26	9	1541
20	38	1542
13	35	1543
8	23	1544
26	17	1545
40	2	1546
42	1	1547
28	18	1548
41	35	1549
45	21	1550
16	31	1551
21	36	1552
19	30	1553
12	6	1554
12	11	1555
12	29	1556
16	17	1557
19	23	1558
30	33	1559
40	48	1560
34	37	1561
19	26	1562
21	4	1563
48	48	1564
1	44	1565
15	37	1566
19	15	1567
34	21	1568
7	43	1569
19	37	1570
45	37	1571
8	26	1572
6	29	1573
33	26	1574
3	33	1575
19	48	1576
2	6	1577
6	5	1578
39	6	1579
9	9	1580
5	6	1581
34	17	1582
39	42	1583
6	3	1584
34	48	1585
32	29	1586
41	7	1587
21	14	1588
26	6	1589
6	2	1590
21	50	1591
40	42	1592
27	42	1593
20	12	1594
3	5	1595
16	47	1596
29	26	1597
29	23	1598
10	22	1599
48	30	1600
22	6	1601
22	11	1602
22	29	1603
26	35	1604
47	18	1605
42	31	1606
6	24	1607
26	24	1608
7	6	1609
7	11	1610
7	29	1611
28	44	1612
33	23	1613
11	10	1614
22	18	1615
38	31	1616
28	41	1617
46	41	1618
46	13	1619
27	14	1620
6	7	1621
26	7	1622
38	49	1623
47	31	1624
3	41	1625
16	24	1626
15	9	1627
9	17	1628
45	14	1629
9	2	1630
13	26	1631
15	3	1632
14	31	1633
11	49	1634
2	9	1635
3	22	1636
49	11	1637
13	48	1638
12	31	1639
9	35	1640
36	28	1641
39	40	1642
43	28	1643
13	23	1644
42	17	1645
15	44	1646
28	16	1647
40	30	1648
49	14	1649
32	9	1650
45	43	1651
39	35	1652
12	33	1653
9	3	1654
48	23	1655
38	41	1656
2	29	1657
45	6	1658
45	11	1659
45	29	1660
32	5	1661
41	48	1662
6	10	1663
26	10	1664
39	9	1665
25	39	1666
3	44	1667
47	33	1668
13	51	1669
25	45	1670
49	42	1671
3	17	1672
11	22	1673
27	18	1674
9	5	1675
26	3	1676
20	13	1677
6	48	1678
26	48	1679
5	35	1680
35	47	1681
26	2	1682
21	47	1683
27	38	1684
27	40	1685
13	30	1686
21	18	1687
13	15	1688
26	42	1689
25	14	1690
49	6	1691
40	51	1692
37	47	1693
5	9	1694
49	43	1695
25	11	1696
46	37	1697
28	35	1698
40	29	1699
6	51	1700
34	49	1701
41	51	1702
15	47	1703
40	15	1704
43	1	1705
39	29	1706
27	6	1707
27	11	1708
27	29	1709
36	1	1710
48	10	1711
15	49	1712
32	31	1713
5	29	1714
20	11	1715
13	28	1716
2	2	1717
39	31	1718
39	17	1719
26	5	1720
5	5	1721
45	33	1722
46	17	1723
27	37	1724
9	51	1725
21	49	1726
28	51	1727
42	33	1728
2	35	1729
32	2	1730
22	31	1731
39	3	1732
16	10	1733
1	45	1734
1	39	1735
32	37	1736
15	35	1737
28	24	1738
30	48	1739
12	5	1740
12	22	1741
49	31	1742
3	49	1743
7	31	1744
39	5	1745
34	35	1746
30	44	1747
49	9	1748
2	3	1749
15	33	1750
32	22	1751
7	18	1752
27	17	1753
30	17	1754
15	5	1755
28	7	1756
34	19	1757
32	17	1758
25	42	1759
32	35	1760
15	51	1761
6	22	1762
28	22	1763
16	30	1764
9	22	1765
16	7	1766
45	31	1767
15	22	1768
25	6	1769
21	13	1770
6	28	1771
48	26	1772
20	6	1773
15	41	1774
47	5	1775
47	22	1776
25	43	1777
5	17	1778
41	28	1779
32	3	1780
35	15	1781
37	15	1782
7	33	1783
34	47	1784
17	37	1785
35	30	1786
37	30	1787
49	17	1788
5	3	1789
20	35	1790
27	43	1791
16	15	1792
40	28	1793
46	38	1794
9	28	1795
28	48	1796
38	17	1797
20	31	1798
28	28	1799
15	2	1800
6	30	1801
26	30	1802
20	17	1803
39	2	1804
9	1	1805
25	47	1806
12	18	1807
30	7	1808
20	9	1809
16	23	1810
28	1	1811
15	10	1812
14	33	1813
35	49	1814
22	33	1815
25	31	1816
2	17	1817
37	22	1818
25	9	1819
34	30	1820
15	28	1821
15	1	1822
2	5	1823
1	11	1824
1	31	1825
49	47	1826
35	10	1827
37	10	1828
20	40	1829
1	9	1830
30	24	1831
30	16	1832
47	1	1833
47	2	1834
47	3	1835
47	9	1836
47	28	1837
47	35	1838
47	51	1839
5	2	1840
45	18	1841
25	17	1842
46	23	1843
2	47	1844
11	23	1845
1	17	1846
15	15	1847
15	30	1848
2	51	1849
39	51	1850
6	15	1851
26	15	1852
49	29	1853
16	48	1854
41	30	1855
7	5	1856
7	22	1857
49	2	1858
34	15	1859
32	47	1860
5	7	1861
20	7	1862
39	7	1863
39	28	1864
12	44	1865
26	51	1866
22	5	1867
22	22	1868
32	51	1869
21	42	1870
41	15	1871
22	1	1872
22	2	1873
22	3	1874
22	9	1875
22	28	1876
22	35	1877
22	51	1878
26	29	1879
49	5	1880
49	35	1881
11	26	1882
5	24	1883
20	24	1884
39	24	1885
5	22	1886
20	3	1887
1	24	1888
2	24	1889
9	24	1890
25	24	1891
32	24	1892
49	24	1893
5	51	1894
20	5	1895
46	40	1896
6	1	1897
41	1	1898
20	42	1899
42	41	1900
9	47	1901
40	22	1902
49	3	1903
38	44	1904
1	6	1905
25	5	1906
2	28	1907
30	15	1908
1	43	1909
22	49	1910
5	28	1911
37	49	1912
2	1	1913
22	41	1914
45	1	1915
45	2	1916
45	3	1917
45	9	1918
45	28	1919
45	35	1920
45	51	1921
46	24	1922
49	37	1923
34	51	1924
25	2	1925
3	16	1926
45	17	1927
39	22	1928
12	1	1929
12	2	1930
12	3	1931
12	9	1932
12	28	1933
12	35	1934
12	51	1935
7	1	1936
7	2	1937
7	3	1938
7	9	1939
7	28	1940
7	35	1941
7	51	1942
28	47	1943
5	10	1944
20	10	1945
39	10	1946
40	23	1947
38	24	1948
2	22	1949
16	26	1950
27	49	1951
32	28	1952
1	47	1953
1	2	1954
15	48	1955
3	7	1956
1	48	1957
2	48	1958
9	48	1959
25	48	1960
32	48	1961
49	48	1962
25	29	1963
47	49	1964
1	7	1965
2	7	1966
9	7	1967
25	7	1968
32	7	1969
49	7	1970
15	17	1971
27	31	1972
32	1	1973
20	2	1974
25	35	1975
1	10	1976
2	10	1977
9	10	1978
25	10	1979
32	10	1980
49	10	1981
26	28	1982
45	5	1983
45	22	1984
47	44	1985
13	1	1986
27	33	1987
27	1	1988
27	2	1989
27	3	1990
27	9	1991
27	28	1992
27	35	1993
27	51	1994
1	14	1995
1	35	1996
5	48	1997
20	48	1998
39	48	1999
[truncated: 358 more rows]
